# Supplementary material for: Ferritin in pediatric critical illness: a scoping review
Source: PubMed Central journal article supplement — Clin Exp Pediatr. 2022 Sep 16;66(3):98–109. doi: 10.3345/cep.2022.00654 (PMC9989723; doi:10.3345/cep.2022.00654), 2022-09-16
Supplement: cep-2022-00654-Supplementary-Material-1.pdf [file cep-2022-00654-Supplementary-Material-1.pdf]

## Supplementary Material 1. Search strategy.

### Pubmed (MEDLINE)

- #1 pediatric\* OR boy OR boys OR girl OR girls OR infant\* OR infancy OR baby OR babies OR newborn\* OR new born\* OR neonat\* OR toddler\* OR preschool\* OR child\* OR preteen OR adolescen\* OR youth OR teen OR teens OR teenager OR exp pediatrics/ OR exp infant/ OR exp child/ OR adolescent/  
#2 critically ill OR intensive care OR PICU OR NICU OR exp critical illness/ OR exp critical care/ OR exp intensive care units/ OR critical care outcomes/  
#3 ferritin\* OR hyperferritin\* OR exp ferritins/ OR exp hyperferritinemia/  
#4 #1 AND #2 AND #3

Filters: English language, humans  
(359)

### Cochrane Library

- #1 pediatric\* OR boy OR boys OR girl OR girls OR infant\* OR infancy OR baby OR babies OR newborn\* OR new born\* OR neonat\* OR toddler\* OR preschool\* OR child\* OR preteen OR adolescen\* OR youth OR teen OR teens OR teenager OR [mh pediatrics] OR [mh infant] OR [mh child] OR [mh adolescent]  
#2 critically ill OR intensive care OR PICU OR NICU OR critical illness OR critical care OR intensive care units OR critical care outcomes  
#3 ferritin\* OR hyperferritin\* OR [mh ferritins] OR [mh hyperferritinemia]  
#4 {AND #1-#3}

Search limits: trials, all dates  
(64)

### ProQuest (including grey literatures)

Databases: Coronavirus Research Database, Ebook Central, publicly available content database

- S1 pediatric\* OR boy OR boys OR girl OR girls OR infant\* OR infancy OR baby OR babies OR newborn\* OR "new born\*" OR neonat\* OR toddler\* OR preschool\* OR child\* OR preteen OR adolescen\* OR youth OR teen OR teens OR teenager  
S2 "critically ill" OR "intensive care" OR PICU OR NICU OR "critical illness" OR "critical care" OR "intensive care units" OR "critical care outcomes"  
S3 TIAB(ferritin\* OR hyperferritin\*)  
S4 1 AND 2 AND 3

Limit to: full text, peer reviewed, all dates, source type (conference papers & proceedings, dissertations & theses, scholarly journals, working papers), English language  
(225)

### ScienceDirect (including grey literatures)

(pediatrics OR neonate OR infant OR child OR adolescent) AND (critically ill OR critical illness) AND (ferritin OR hyperferritin)

Refine by: article type (research articles)  
(876)

### Epistemonikos

(pediatric\* OR boy OR boys OR girl OR girls OR infant\* OR infancy OR baby OR babies OR newborn\* OR "new born\*" OR neonat\* OR toddler\* OR preschool\* OR child\* OR preteen OR adolescen\* OR youth OR teen OR teens OR teenager) AND ("critically ill" OR "intensive care" OR PICU OR NICU OR "critical illness" OR "critical care" OR "intensive care units" OR "critical care outcomes") AND (ferritin\* OR hyperferritin\*)

Field: title/abstract

Publication type: primary study  
(56)
