# Supplementary material for: Ferritin in pediatric critical illness: a scoping review
Source: PubMed Central journal article supplement — Clin Exp Pediatr. 2022 Sep 16;66(3):98–109. doi: 10.3345/cep.2022.00654 (PMC9989723; doi:10.3345/cep.2022.00654), 2022-09-16
Supplement: cep-2022-00654-Supplementary-Material-2.pdf [file cep-2022-00654-Supplementary-Material-2.pdf]

| #  | year | first author   | country of origin     | income group       | study design                    | type                          | setting                                        | sample size (n) | age category          | age (years)     | male/female | gender ratio |
|----|------|----------------|-----------------------|--------------------|---------------------------------|-------------------------------|------------------------------------------------|-----------------|-----------------------|-----------------|-------------|--------------|
| 1  | 2021 | Fernandes      | United States         | high               | cohort                          | retrospective and prospective | 8 pediatric hospitals                          | 281             | Mixed                 | 10 (1-17)       | 170/111     | 1.5          |
| 6  | 2015 | Papageorgiou   | Greece                | high               | case control                    | prospective                   | pediatric clinic                               | 100             | Infants, children     | 2.1 ± 1.1       | 44/56       | 0.8          |
| 8  | 2019 | Jinkawa        | Japan                 | high               | observational                   |                               |                                                | 64              | Infants, children     | 2.1 (0.1-10.4)  | 36/28       | 1.3          |
| 9  | 2021 | Williams       | India                 | lower middle       | observational                   | prospective                   | tertiary care teaching hospital                | 72              | Children              | 5 (3-8)         | 45/27       | 1.7          |
| 11 | 2017 | Higgins        | United States         | high               | observational                   | retrospective                 | pediatric hospital                             | 28              | Mixed                 | 10.3 ± 5.5      | 13/15       | 0.9          |
| 12 | 2006 | Widness        | Austria               | high               | RCT                             | prospective                   |                                                | 29              | Neonates              | 0.06 ± 0.008    | 16/13       | 1.2          |
| 14 | 2020 | Xu             | China                 | upper middle       | observational                   | retrospective                 | pediatric hospital                             | 285             | Infants, children     | 1.7 (1-5)       | 180/105     | 1.7          |
| 15 | 2021 | Karimi         | Iran                  | lower middle       | observational                   | retrospective                 | 3 referral immunodeficiency centers            | 33              | Children, adolescents | 6.7 (2.3-16.5)  | 19/14       | 1.4          |
| 17 | 2021 | Balagurunathan | India                 | lower middle       | observational                   | retrospective and prospective | tertiary care teaching hospital                | 21              | Mixed                 | 6.9 ± 4         | 15/6        | 2.5          |
| 18 | 2018 | Mohan          | India                 | lower middle       | RCT                             | prospective                   | college hospital                               | 60              | Neonates              | neonates        |             | 0            |
| 19 | 2021 | Alshengeti     | Saudi Arabia          | high               | observational                   | retrospective                 | 2 pediatric hospitals                          | 106             | Mixed                 | 3.2 ± 3.8       | 52/54       | 1            |
| 25 | 2021 | Penner         | United Kingdom        | high               | cohort                          | retrospective                 | tertiary pediatric hospital                    | 46              | Children, adolescents | 10.2 (8.8-13.3) | 30/16       | 1.9          |
| 26 | 2021 | Emeksiz        | Turkey                | upper middle       | observational                   | retrospective                 | PICU                                           | 27              | Children, adolescents | 9 (7-13)        | 17/10       | 1.7          |
| 28 | 2021 | Hammad         | Egypt                 | lower middle       | observational                   | prospective                   | pediatric cancer hospital                      | 76              | Mixed                 | 9 (1-18)        | 42/34       | 1.2          |
| 29 | 2019 | Choi           | South Korea           | high               | case control                    | prospective                   | pediatric university hospital                  | 123             | Mixed                 | 5 (1-17)        | 70/53       | 1.3          |
| 31 | 2020 | Ling           | China                 | high               | case control                    | retrospective                 | respiratory department of a pediatric hospital | 345             | Children              | 8 (4-6)         | 194/151     | 1.3          |
| 32 | 2021 | Astagimath     | India                 | lower middle       | observational                   | retrospective                 | tertiary care hospital                         | 54              | Mixed                 | 1-15            |             | 0            |
| 37 | 2020 | Torres         | Chile                 | high               | observational                   | retrospective and prospective | 3 public pediatric reference hospitals         | 27              | Mixed                 | 6 (0-14)        | 14/13       | 1.1          |
| 38 | 2017 | Muzaheed       | Pakistan              | lower middle       | observational                   |                               | university laboratory                          | 916             | Mixed                 | 7.1 ± 2.5       | 612/304     | 2            |
| 41 | 2019 | Güngör         | Turkey                | upper middle       | observational                   | retrospective                 | university department                          | 44              | Mixed                 | 8.8 ± 2.9       |             | 0            |
| 43 | 2020 | Williams       | India                 | lower middle       | observational                   | prospective                   | tertiary care teaching hospital                | 202             | Children              | 5 (2.5-8)       | 109/93      | 1.2          |
| 44 | 2021 | Mottaghipisheh | Iran                  | lower middle       | observational                   | prospective                   | tertiary oncology referral center              | 60              | Infants, children     | 0.9 (0.3-3.0)   | 34/26       | 1.3          |
| 45 | 2021 | Turay          | Turkey                | upper middle       | case control                    | retrospective                 | university department                          | 97              | Mixed                 | 1.7 ± 1         | 31/66       | 0.5          |
| 47 | 2021 | Alfraj         | Kuwait, Saudi Arabia  | high               | cohort                          | retrospective                 | 8 pediatric centers                            | 25              | Infants, children     | 2.8 (0.2-8.5)   | 15/10       | 1.5          |
| 53 | 2021 | Acevedo        | Colombia              | upper middle       | cohort                          | prospective                   | 14 PICUs                                       | 78              | Infants, children     | 7 (1-11)        | 46/32       | 1.4          |
| 54 | 2021 | Yang           | Taiwan                | high               | observational                   | retrospective                 | university hospital                            | 12              | Children              | 4.9 (2.5-6.3)   | 5/7         | 0.7          |
| 55 | 2021 | Tiwari         | India                 | lower middle       | cohort                          | prospective                   | 2 tertiary care hospitals                      | 41              | Mixed                 | 6.2 ± 4.0       | 23/18       | 1.3          |
| 57 | 2021 | Atay           | Turkey                | upper middle       | observational                   | retrospective                 | PICU                                           | 41              | Children, adolescents | 10 (2-20)       | 33/8        | 4.1          |
| 59 | 2020 | Lee            | United States         | high               | observational                   | retrospective                 | pediatric hospital                             | 28              | Mixed                 | 9 (0.1-17)      | 16/12       | 1.3          |
| 60 | 2021 | Valverde       | 17 European countries | high, upper middle | real-time internet-based survey | prospective                   | 55 centres                                     | 286             | Children              | 8.4 (3.8-12.4)  | 194/92      | 2.1          |
| 64 | 2020 | Pereira        | Brazil                | upper middle       | observational                   | cross-sectional               | university hospital                            | 66              | Mixed                 | 0.01-17.62      | 33/33       | 1            |
| 65 | 2017 | Fitzgerald     | United States         | high               | phase I/IIA Clinical Trial      | prospective                   | pediatric hospital                             | 39              | Children, adolescents | 11 (5-22)       | 20/19       | 1.1          |

|     |      |             |                                       |                    |                                        |                   |                                |      |                       |                 |         |     |
|-----|------|-------------|---------------------------------------|--------------------|----------------------------------------|-------------------|--------------------------------|------|-----------------------|-----------------|---------|-----|
| 66  | 2020 | Pouletty    | France                                | high               | observational                          | retrospective     | 7 hospitals                    | 16   | Children              | 10 (4.7-12.5)   | 8/8     | 1   |
| 68  | 2020 | Kurokawa    | Japan                                 | high               | observational                          | retrospective     | university hospital            | 69   | Children, adolescents | 8.4 (2.1-17.7)  | 44/25   | 1.8 |
| 69  | 2019 | Horvat      | United States                         | high               | cohort                                 | retrospective     | PICU                           | 297  | Children, adolescents | 10.4 (3.2-15.8) | 141/156 | 0.9 |
| 73  | 2020 | Clark       | United States, Spain, United Kingdom, | high, lower middle | observational                          | retrospective     | 6 hospitals                    | 55   | Mixed                 | 7 ± 5.2         | 34/21   | 1.6 |
| 74  | 2017 | Tonial      | Spain                                 | high               | cohort                                 | prospective       | PICU                           | 20   | Mixed                 | 0.5 ± 0.2       | 12/8    | 1.5 |
| 77  | 2021 | Tonial      | Brazil                                | upper middle       | observational                          | retrospective     | PICU                           | 294  | Infants, children     | 2.3 (0.9-6.5)   | 161/133 | 1.2 |
| 78  | 2020 | Pal         | India                                 | lower middle       | observational                          | retrospective     | university department          | 31   | Children              | 5.25            | 17/14   | 1.2 |
| 80  | 2020 | Tonial      | Brazil                                | upper middle       | cohort                                 | retrospective     | PICU                           | 312  | Infants, children     | 2.0 (0.9-5.6)   | 171/141 | 1.2 |
| 81  | 2021 | Klymet      | Turkey                                | upper middle       | observational                          | retrospective     | university hospital            | 58   | Mixed                 | 6 (0.2-16)      | 38/20   | 1.9 |
| 83  | 2017 | Carcillo    | United States                         | high               | cohort                                 | prospective       | PICU                           | 100  | Mixed                 | 5.8 ± 5.7       | 53/47   | 1.1 |
| 85  | 2019 | Simon       | United States                         | high               | observational                          | prospective       | PICU                           | 75   | Mixed                 | 6.2 ± 6.0       | 42/33   | 1.3 |
| 88  | 2016 | Al-Ghananim | United States                         | high               | observational                          | retrospective     | NICU                           | 26   | Neonates              | neonates        | 11/15   | 0.7 |
| 89  | 2012 | Demirkol    | Turkey                                | upper middle       | cohort                                 |                   | 8 critical care study group    | 23   | Mixed                 | 7.2 ± 3.6       | 17/6    | 2.8 |
| 91  | 2017 | Carcillo    | United States                         | high               | cohort                                 | prospective       | PICU                           | 100  | Mixed                 | 5.82 ± 5.69     | 53/47   | 1.1 |
| 94  | 2021 | Aydin       | Turkey                                | upper middle       | observational                          | retrospective     | clinic                         | 39   | Mixed                 | 6.10 ± 4.52     | 25/14   | 1.8 |
| 95  | 2019 | Cui         | China                                 | high               | case control                           | prospective       | PICU                           | 69   | Infants, children     | 1 (0.8-4)       | 42/27   | 1.6 |
| 96  | 2016 | Ellis       | Puerto Rico                           | high               | case control                           | retrospective and | 4 facilities                   | 110  | Mixed                 | 1 (0.2-17.9)    | 66/44   | 1.5 |
| 97  | 2021 | Abrams      | United States                         | high               | surveillance study                     | retrospective     | CDC                            | 1080 | Children              | 8 (4-12)        | 602/476 | 1.3 |
| 98  | 2018 | Goldman     | United States                         | high               | cohort                                 | retrospective     | PICU                           | 43   | Mixed                 | 5.1 (0.04-17.5) | 16/27   | 0.6 |
| 99  | 2011 | Bennett     | United States                         | high               | cohort                                 | retrospective     | pediatric hospital             | 171  | Mixed                 | 9.3 ± 6.3       | 98/73   | 1.3 |
| 101 | 2012 | Amin        | United States                         | high               | observational                          | prospective       | NICU                           | 140  | Neonates              | neonates        | 67/73   | 0.9 |
| 102 | 2021 | Cattalini   | Italy                                 | high               | observational                          | retrospective     | 3 tertiary pediatric hospitals | 149  | Infants, children     | 3 (1-6)         | 84/65   | 1.3 |
| 103 | 2018 | Ghosh       | India                                 | lower middle       | observational                          | prospective       | tertiary hospital              | 42   | Infants, children     | 2.5 (1.1-7.2)   | 22/20   | 1.1 |
| 104 | 2016 | Cui         | China                                 | high               | nonrandomized concurrent control trial | prospective       | PICU                           | 33   | Mixed                 | 3.5 ± 4.2       | 20/13   | 1.5 |
| 106 | 2020 | Deep        | United Kingdom                        | high               | observational                          | retrospective     | 15 PICUs                       | 116  | Children, adolescents | 11 (7-14)       | 76/40   | 1.9 |
| 107 | 2008 | Mäkelä      | Finland                               | high               | observational                          | prospective       | NICU                           | 97   | Neonates              | neonates        | 52/45   | 1.2 |
| 108 | 2008 | Allen       | United States                         | high               | observational                          | retrospective     | pediatric hospital             | 330  | Mixed                 | 6.6 (1-16)      | 163/167 | 1   |
| 109 | 2021 | Jat         | India                                 | lower middle       | observational                          | retrospective     | 5 centers                      | 402  | Children              | 7 (2-11)        | 247/155 | 1.6 |
| 110 | 2017 | Ochiai      | Japan                                 | high               | observational                          | prospective       | NICU                           | 176  | Neonates              | neonates        | 86/90   | 1   |
| 113 | 2007 | Garcia      | Brazil                                | upper middle       | cohort                                 | prospective       | PICU                           | 36   | Infants, children     | 0.5 (0.2-8.3)   | 24/12   | 2   |
| 114 | 2021 | Sa          | United Kingdom                        | high               | observational                          | cross-sectional   | pediatric hospital             | 75   | Mixed                 | 10 (7.9)        | 50/25   | 2   |
| 115 | 2014 | Minoia      | Italy                                 | high               | cohort                                 | retrospective     | multinational multicenter      | 362  | Children              | 5.3 (2.7-10.1)  | 154/208 | 0.7 |
| 124 | 2004 | Haiden      | Austria                               | high               | RCT                                    | prospective       | NICU                           | 40   | Neonates              | neonates        | 19/21   | 0.9 |
| 127 | 2003 | Jacobs      | United States                         | high               | RCT                                    | prospective       | pediatric hospital             | 44   | Mixed                 | 3.5 ± 1.1       | 30/14   | 2.1 |

all ferritin values expressed in ng/mL unit

AKI: acute kidney injury, AUC: area under the curve, COVID-19: coronavirus disease 2019, DIC: disseminated intravascular coagulation, ELISA: enzyme-linked immunosorbent assay, FS: febrile seizure, HBD: hepatobiliary dysfunction, HCT: hematopoietic cell transplantation, HF: heart failure, ICU: intensive care unit, IEI: inborn errors of immunity, IPH: idiopathic pulmonary hemosiderosis, HLH: hemophagocytic lymphohistiocytosis, KD: Kawasaki disease, MAS: macrophage activation syndrome, MISC: multisystem inflammatory syndrome in children, MODS: multiple organ dysfunction syndrome, MOF: multiple organ failure, PIMS-TS: paediatric inflammatory multisystem syndrome temporally associated with SARS-CoV-2, PCR: polymerase chain reaction, ROC: receiver operating characteristic, SARS-CoV 2: severe acute respiratory syndrome coronavirus 2, sJIA: systemic juvenile idiopathic arthritis, TPE: therapeutic plasma exchange, VL: visceral leishmaniasis

| #  | year | first author   | ferritin definition                                                                | ferritin threshold                         | AUC (95%CI)         | sensitivity (%) | specificity (%) | normal range                   | increase d (%) | normal (%)    | decreased (%) | ferritin statistic: timing | overall statistics | case/intervention     | control/comparator     | diagnosis/condition                         | outcome                                            | analysis description                | significance                    | analysis                             |                                                               |
|----|------|----------------|------------------------------------------------------------------------------------|--------------------------------------------|---------------------|-----------------|-----------------|--------------------------------|----------------|---------------|---------------|----------------------------|--------------------|-----------------------|------------------------|---------------------------------------------|----------------------------------------------------|-------------------------------------|---------------------------------|--------------------------------------|---------------------------------------------------------------|
| 1  | 2021 | Fernandes      | MISC: elevation of ferritin                                                        | 500                                        |                     |                 |                 |                                | 87/170 (51.2)  |               |               | frequency                  | peak               |                       |                        | COVID-19, MISC                              | severity                                           |                                     | no                              | Fisher exact test                    |                                                               |
| 6  | 2015 | Papageorgiou   | iron deficiency: ≤30                                                               | 30                                         |                     |                 |                 |                                |                |               | 14/100 (14)   | mean ± SD                  | baseline           | 48.61 ± 36.63         | 74.03 ± 38.04          | febrile seizure                             | iron deficiency                                    | complex FS vs simple FS and control | yes                             | independent t-test, Chi square       |                                                               |
| 8  | 2019 | Jinkawa        | disease activity in KD and MAS, MAS: >684                                          | 684                                        |                     |                 |                 |                                | 5/5 (100)      |               |               | mean ± SD                  | baseline           | 8741 ± 8181.5         |                        | MAS in KD                                   |                                                    |                                     |                                 |                                      |                                                               |
| 9  | 2021 | Williams       | hyperferritinemia: >500, mild: 500-2000, moderate: >2000-10000, and severe: >10000 | 2000                                       | 0.56 (0.35-0.78)    | 50              | 73              | <500                           | 45/62 (72.6)   | 17/62 (27.4)  |               | median (IQR)               | baseline           | 668 (420-2714)        | 1806 (443-4727)        | 666 (382-2653)                              | scrub typhus                                       | mortality                           |                                 | no                                   | ROC curves, Mann-Whitney test                                 |
| 11 | 2017 | Higgins        | iron deficiency in adult HF: <100                                                  | 100                                        |                     |                 |                 |                                |                |               | 26/28 (92.9)  | mean ± SD                  | baseline           | 45 ± 30               |                        | HF secondary to dilated cardiomyopathy      | mortality                                          | base-2 logarithm                    | yes                             | relative risk regression             |                                                               |
| 12 | 2006 | Widness        | iron storage                                                                       | 15                                         |                     |                 |                 |                                |                |               | 7/18 (38.9)   | mean ± SD                  | baseline           | 351 ± 55              | 310 ± 32               | very preterm, very low birth weight infants |                                                    |                                     |                                 |                                      |                                                               |
| 14 | 2020 | Xu             |                                                                                    |                                            |                     |                 |                 |                                |                |               |               | mean ± SD                  | baseline           | 1945 ± 1001           | 465 ± 195              | adenoviral pneumonia                        | severity                                           |                                     | yes                             | t-test                               |                                                               |
| 15 | 2021 | Karimi         |                                                                                    |                                            |                     |                 |                 |                                |                |               |               | median (IQR)               | not given          | 413 (95-1500)         | 800 (800-2037)         | 125 (78-413)                                | COVID-19 in IEI                                    | mortality                           |                                 | yes                                  | Mann-Whitney test                                             |
| 17 | 2021 | Balagurunathan |                                                                                    | 500                                        |                     |                 |                 |                                | 9/21 (42.9)    |               |               | frequency                  | not given          |                       |                        | MISC                                        | hospital stay ≥7 days                              |                                     | yes                             | univariate analysis                  |                                                               |
| 18 | 2018 | Mohan          | iron store                                                                         |                                            |                     |                 |                 |                                |                |               |               | mean ± SD                  | post-intervention  | 244.853 ± 187.334     | 148.542 ± 161.961      | neonates requiring resuscitation            |                                                    |                                     |                                 |                                      |                                                               |
| 19 | 2021 | Alshengeti     |                                                                                    | 500                                        |                     |                 | <500            |                                | 30/35 (85.7)   | 5/35 (14.3)   |               | mean ± SD                  | not given          | 424.35 ± 763.85       |                        | COVID-19                                    |                                                    |                                     |                                 |                                      |                                                               |
| 25 | 2021 | Penner         | systemic inflammation: >300                                                        | 300                                        |                     |                 | 15.1-70.0       |                                |                |               |               | median (IQR)               | baseline           | 915 (475-1650)        |                        | PIMS-TS                                     |                                                    |                                     |                                 |                                      |                                                               |
| 26 | 2021 | Emeksiz        | evidence of inflammation: >140                                                     | 140                                        |                     |                 | 7-140           |                                |                |               |               | median (IQR)               | baseline           | 535 (326.8-1533.1)    | 1435 (445.5-1744)      | 438.5 (226.3-671.5)                         | MISC                                               | determinant                         | TPE vs non-TPE                  | yes                                  | Wilcoxon test                                                 |
| 28 | 2021 | Hammad         | high: >1000                                                                        | 1000                                       |                     |                 |                 |                                | 50/74          |               |               | frequency                  | not given          |                       |                        |                                             | COVID-19 in Mycoplasma pneumoniae pneumonia        | severity                            |                                 | yes                                  | Chi-square or Fisher's exact test                             |
| 29 | 2019 | Choi           |                                                                                    | 230                                        |                     | 67              | 67              |                                |                |               |               | median                     | not given          |                       | 35.95                  |                                             | Mycoplasma pneumoniae pneumonia                    | refractory                          |                                 | yes                                  | ROC curves, Mann-Whitney U test                               |
| 31 | 2020 | Ling           |                                                                                    | 171.15 (ROC), 174.15 (logistic regression) | 0.806               | 82.4            | 69.3            |                                |                |               |               | mean ± SD                  | baseline           | 421.61 ± 341.06       | 150.85 ± 167.70        |                                             | COVID-19                                           | MPP with hypoxia vs general MPP     | yes                             | ROC curves, logistic regression      |                                                               |
| 32 | 2021 | Astagimath     |                                                                                    |                                            |                     |                 |                 | 24-336 (male), 11-307 (female) |                |               |               | mean ± SD                  | not given          | 167.2 ± 256.6         |                        |                                             |                                                    |                                     |                                 |                                      |                                                               |
| 37 | 2020 | Torres         |                                                                                    |                                            |                     |                 |                 |                                |                |               |               | median (IQR)               | not given          | 309 (156-696)         | 542 (135-835)          | 230 (156-298)                               | MISC                                               | ICU admission                       |                                 | no                                   | Mann-Whitney rank sum test                                    |
| 38 | 2017 | Muzaaheed      | iron excess                                                                        |                                            |                     |                 |                 |                                |                |               |               | mean ± SD                  | not given          | 4989.3 ± 1978.3       | 3849.5 ± 1513.5        | 6413.5 ± 2103.9                             | severe sepsis in transfusion dependent thalassemia | bacterial infection                 |                                 | yes                                  | t-test                                                        |
| 41 | 2019 | Güngör         | deficient: ≤30, normal: 31-99, high: ≥100                                          | 93.5                                       | (0.773-0.989)       | 92.9            | 66.2            | 31-99                          |                |               |               | mean ± SD                  | not given          | 1503.50 ± 2280.44     | 57.43 ± 35.96          | Wilson's disease                            | fulminant                                          | fulminant vs asymptomatic           | yes                             | ROC curves, Pearson Correlation test |                                                               |
| 43 | 2020 | Williams       | hyperferritinemia: >500                                                            | 500                                        | 0.53 (0.53-0.67)    | 62              | 36              | ≤500                           | 124/183 (67.8) | 59/183 (32.2) |               | median (IQR)               | baseline           | 798 (378-3205)        | 1381 (433-5410)        | 707 (365-2937)                              | sepsis                                             | 28 days mortality                   |                                 | no                                   | ROC curves, student t-test                                    |
| 44 | 2021 | Mottaghpisheh  | high: >500, extreme hyperferritinemia: >10000                                      | 500                                        |                     |                 |                 |                                | 60/60 (100)    |               |               | median (range)             | baseline           | 4825 (2000.0-10324.5) | 7122 (3226.2-33112.2)  | 3618 (1990.2-9479.2)                        | HLH                                                | secondary to VL                     | VL-associated vs primary        | yes                                  | Mann-Whitney U test                                           |
| 45 | 2021 | Turay          |                                                                                    |                                            |                     |                 |                 |                                |                |               |               | mean ± SD                  | not given          | 28 ± 32               | 41 ± 54                | 22 ± 16                                     | febrile seizure                                    | complex FS                          | complex vs simple FS            | yes                                  | independent samples t-test                                    |
| 47 | 2021 | Alfraj         |                                                                                    |                                            |                     |                 |                 |                                |                |               |               | mean ± SD                  | baseline           | 1229 ± 1689           | 587 ± 796              | 1358 ± 1807                                 | COVID-19                                           | mortality                           |                                 | no                                   | unpaired t-test                                               |
| 53 | 2021 | Acevedo        |                                                                                    | 500                                        |                     |                 |                 |                                | 39/78 (50)     |               |               | frequency                  | not given          |                       |                        | MISC                                        | mortality                                          |                                     | yes                             | logistic regression                  |                                                               |
| 54 | 2021 | Yang           | iron definition: <12 (<5 years), <15 (≥5 years)                                    |                                            |                     |                 |                 |                                |                |               |               | median (IQR)               | baseline           | 141.3 (27.9-188.0)    | 320 (98.8-619)         | 38.7 (12.7-60.2)                            | IPH                                                | ICU admission                       |                                 | yes                                  | stepwise multiple regression analysis                         |
| 55 | 2021 | Tiwari         | high: >300                                                                         | 300                                        |                     |                 |                 |                                | 22/41 (54)     |               |               | median (IQR)               | peak               | 350 (170-733)         | 1178.0 (717.0-23840.0) | 266.0 (153.0-555.0)                         | MISC                                               | mechanical ventilation requirement  |                                 | yes                                  | Mann-Whitney test                                             |
| 57 | 2021 | Atay           |                                                                                    |                                            |                     |                 |                 |                                |                |               |               | median (IQR)               | not given          | 1200 (367-22627)      | 332.5(16-3274)         |                                             | MISC                                               | PICU admission                      |                                 | yes                                  | Mann-Whitney U test                                           |
| 59 | 2020 | Lee            |                                                                                    | 200                                        |                     |                 |                 |                                | 24/28 (86)     |               |               | median                     | not given          |                       | 537                    | 4594                                        | MISC                                               | MISC                                | MISC vs MAS                     | yes                                  | Mann-Whitney U test                                           |
| 60 | 2021 | Valverde       |                                                                                    | 200                                        |                     |                 | 50-200          |                                | 176/222 (79)   |               |               | median (IQR)               | baseline           | 438 (420-846)         |                        |                                             | MISC                                               | ICU admission                       |                                 | yes                                  | Mann-Whitney U test                                           |
| 64 | 2020 | Pereira        |                                                                                    |                                            |                     |                 |                 | 36-391                         |                |               |               | median (range)             | not given          | 3660 (469-35976)      | 3295 (2567-8000)       |                                             | MISC                                               | MISC                                |                                 | yes                                  | Mann-Whitney U test                                           |
| 65 | 2017 | Fitzgerald     | high: >500                                                                         | 4984.4                                     |                     |                 | ≤500            |                                | 18/39 (46)     |               |               | median (IQR)               | peak               | 60214 (12000-130000)  |                        |                                             | cytokine release syndrome                          | longer organ dysfunction resolution |                                 | yes                                  | Kaplan-Meier and Cox regression analysis                      |
| 66 | 2020 | Pouletty       | highly elevated: >500                                                              | 1400                                       | 0.957               | 80              | 100             | not given                      | 12/14 (85.7)   |               |               | median (IQR)               | not given          | 1067 (272-1709)       | 1760 (1693-2500)       | 295 (165-536)                               | Kawa- COVID-19                                     | severity                            | ROC: combined with age >5 years | yes                                  | ROC curves, Mann-Whitney U test                               |
| 68 | 2020 | Kurokawa       |                                                                                    | 1000                                       |                     |                 |                 |                                | 26 (37.7)      |               |               | frequency                  | baseline           |                       |                        |                                             | allogeneic HCT                                     | stage-3 AKI                         |                                 | yes                                  | Cox regression model                                          |
| 69 | 2019 | Horvat         |                                                                                    | 373                                        | 0.88 (0.79-0.97)    |                 |                 |                                |                |               |               | median (IQR)               | peak               | 49 (17.2-153.3)       |                        |                                             | hospitalized                                       | 90-day mortality                    |                                 | yes                                  | ROC curves with 1000 bootstrap replicates                     |
| 73 | 2020 | Clark          |                                                                                    |                                            |                     |                 |                 |                                |                |               |               | mean ± SD                  | baseline           | 171 ± 57              | 678 ± 107              | COVID-19                                    | complete KD                                        |                                     | yes                             | Mann-Whitney test                    |                                                               |
| 74 | 2017 | Tonial         |                                                                                    | 300                                        |                     |                 |                 |                                | 8/20 (40)      |               |               | median (IQR)               | baseline           | 172 (118.3-514)       | 454.4 ± 309.7          | 91.9 ± 6                                    | sepsis                                             | fewer                               |                                 | yes                                  | Student's t-test or ANOVA                                     |
| 77 | 2021 | Tonial         |                                                                                    | 135                                        | 0.785 (0.733-0.830) | 96              | 49              |                                |                |               |               | median (IQR)               | peak               | 149.5 (81.7-377.2)    | 607 (217-1251)         | 138 (78-296)                                | sepsis                                             | mortality                           |                                 | yes                                  | ROC curve (Youden's index), nonparametric Mann-Whitney U test |
| 78 | 2020 | Pal            |                                                                                    | 50000                                      |                     |                 |                 | 10-118                         |                |               |               | mean ± SD                  | not given          | 41785 ± 41448         |                        |                                             | MAS                                                | mortality                           |                                 | yes                                  | Pearson's Chi-square test                                     |
| 80 | 2020 | Tonial         |                                                                                    |                                            |                     |                 |                 |                                |                |               |               | median (IQR)               | not given          | 150.5 (82.25-362)     | 586 (226-1093)         | 138 (80.5-287)                              | sepsis                                             | mortality                           |                                 | yes                                  | Mann-Whitney U test                                           |

| #                                                                                                                                                                                                                                                                                                                                                                                                                                                                                                                                                                                                                                                                                                                                                                                                                                                                                                                                                                                 | year | first author | ferritin definition                                    | ferritin threshold | AUC (95%CI)         | sensitivity (%)  | specificity (%) | normal range | increase d (%) | normal (%)    | decreased (%) | ferritin statistic: timing | overall statistics | case/intervention                               | control/comparator           | diagnosis/condition                | outcome                        | analysis description                                                                                                                                           | significance                                   | analysis                                                  |                                           |
|-----------------------------------------------------------------------------------------------------------------------------------------------------------------------------------------------------------------------------------------------------------------------------------------------------------------------------------------------------------------------------------------------------------------------------------------------------------------------------------------------------------------------------------------------------------------------------------------------------------------------------------------------------------------------------------------------------------------------------------------------------------------------------------------------------------------------------------------------------------------------------------------------------------------------------------------------------------------------------------|------|--------------|--------------------------------------------------------|--------------------|---------------------|------------------|-----------------|--------------|----------------|---------------|---------------|----------------------------|--------------------|-------------------------------------------------|------------------------------|------------------------------------|--------------------------------|----------------------------------------------------------------------------------------------------------------------------------------------------------------|------------------------------------------------|-----------------------------------------------------------|-------------------------------------------|
| 81                                                                                                                                                                                                                                                                                                                                                                                                                                                                                                                                                                                                                                                                                                                                                                                                                                                                                                                                                                                | 2021 | Klymet       |                                                        |                    |                     |                  |                 |              |                |               |               | median (IQR)               | baseline           | 625 (103-8433)                                  | 310 (48.5-5546)              | MISC                               | PICU admission                 |                                                                                                                                                                | yes                                            | nonparametric Mann-Whitney U test                         |                                           |
| 83                                                                                                                                                                                                                                                                                                                                                                                                                                                                                                                                                                                                                                                                                                                                                                                                                                                                                                                                                                                | 2017 | Carcillo     |                                                        |                    |                     |                  |                 |              |                |               |               | median (IQR)               | peak               | 670 (240-2610), 885 (285-3205), 1100 (390-4770) | 200 (120-420), 185 (100-360) | sepsis                             | inflammatory MOF phenotypes    | MOF with inflammation phenotypes, immunoparalysis associated MOF, thrombocytopenia associated MOF vs single organ failure, MOF without inflammation phenotypes | yes                                            | Wilcoxon-Mann-Whitney rank-sum test                       |                                           |
| 85                                                                                                                                                                                                                                                                                                                                                                                                                                                                                                                                                                                                                                                                                                                                                                                                                                                                                                                                                                                | 2019 | Simon        |                                                        |                    | 1210                | 0.89 (0.74-1.04) | 88              | 85 ≤1000     | 7/18 (38.9)    |               |               | mean ± SD                  | peak               | 2025 ± 6233                                     | 3752 ± 9245                  | 874 ± 2369                         | sepsis                         | DNA viremia                                                                                                                                                    |                                                | yes                                                       | ROC curve, unpaired t-test                |
| 88                                                                                                                                                                                                                                                                                                                                                                                                                                                                                                                                                                                                                                                                                                                                                                                                                                                                                                                                                                                | 2016 | Al-Ghananim  | iron deficiency for term infant: <15                   | 15                 |                     |                  |                 |              |                | 26/26 (100)   |               | mean ± SD                  | baseline           | 143 ± 126                                       |                              |                                    | very low birth weight infants  |                                                                                                                                                                |                                                |                                                           |                                           |
| 89                                                                                                                                                                                                                                                                                                                                                                                                                                                                                                                                                                                                                                                                                                                                                                                                                                                                                                                                                                                | 2012 | Demirkol     | hyperferritinemia: >500                                | 500                |                     |                  |                 |              | 23/23 (100)    |               |               | median (range)             | not given          | 6341 (765-100000)                               | 40802 (16348-65256)          | 5054 (765-100000)                  | secondary HLH/sepsis/MO DS/MAS | mortality                                                                                                                                                      |                                                | no                                                        | Mann-Whitney U                            |
| 91                                                                                                                                                                                                                                                                                                                                                                                                                                                                                                                                                                                                                                                                                                                                                                                                                                                                                                                                                                                | 2017 | Carcillo     | MAS: >500                                              | 1980               | 0.878 (0.751-1.000) | 75               | 92              | 13/100 (13)  |                |               |               | frequency                  | baseline           |                                                 |                              |                                    | severe sepsis                  | mortality                                                                                                                                                      |                                                | yes                                                       | ROC curve (Youden index)                  |
| 94                                                                                                                                                                                                                                                                                                                                                                                                                                                                                                                                                                                                                                                                                                                                                                                                                                                                                                                                                                                | 2021 | Aydin        | MAS: >684                                              | 684                |                     |                  |                 |              |                |               |               | mean ± SD                  | baseline           | 17863 ± 21846                                   | 753 ± 586                    | MAS due to                         | MAS                            | MAS vs MISC                                                                                                                                                    | yes                                            | Mann-Whitney U test                                       |                                           |
| 95                                                                                                                                                                                                                                                                                                                                                                                                                                                                                                                                                                                                                                                                                                                                                                                                                                                                                                                                                                                | 2019 | Cui          | hyperferritinemia: >500                                | 500                | 0.767 (0.633-0.899) |                  |                 |              |                |               |               | median (IQR)               | baseline           | 2689 (1554-7142)                                | 1025.2 (682.2-1779.4)        | sepsis                             | sepsis-dengue                  |                                                                                                                                                                | yes                                            | ROC curve (Youden index), conditional logistic regression |                                           |
| 96                                                                                                                                                                                                                                                                                                                                                                                                                                                                                                                                                                                                                                                                                                                                                                                                                                                                                                                                                                                | 2016 | Ellis        |                                                        |                    | 500                 |                  |                 |              | 69/110         |               |               | median (range)             | not given          | 17794 (754-522000)                              | 4139 (42-30346)              | dengue                             |                                |                                                                                                                                                                | yes                                            | multivariable logistic regression                         |                                           |
| 97                                                                                                                                                                                                                                                                                                                                                                                                                                                                                                                                                                                                                                                                                                                                                                                                                                                                                                                                                                                | 2021 | Abrams       |                                                        |                    |                     |                  |                 |              |                |               |               | median (IQR)               | peak               | 463 (225-911)                                   | 626 (350-1171)               | 289 (156-529)                      | MISC                           | ICU admission, shock, decreased cardiac function                                                                                                               | ICU admission on first day vs no ICU admission | yes                                                       |                                           |
| 98                                                                                                                                                                                                                                                                                                                                                                                                                                                                                                                                                                                                                                                                                                                                                                                                                                                                                                                                                                                | 2018 | Goldman      |                                                        |                    | 10000               |                  |                 |              |                |               |               | median (IQR)               | peak               | 47500 (24016-                                   | 11884 (3130-                 | HLH                                | mortality                      |                                                                                                                                                                | yes                                            | Fisher exact test                                         |                                           |
| 99                                                                                                                                                                                                                                                                                                                                                                                                                                                                                                                                                                                                                                                                                                                                                                                                                                                                                                                                                                                | 2011 | Bennett      |                                                        |                    | 3000                |                  |                 |              | 68/171 (39.8)  |               |               | frequency                  | peak               |                                                 |                              | ICU                                | ICU admission, mortality       |                                                                                                                                                                | yes                                            | Tarone's test for the trend, Cox regression model         |                                           |
| 101                                                                                                                                                                                                                                                                                                                                                                                                                                                                                                                                                                                                                                                                                                                                                                                                                                                                                                                                                                               | 2012 | Amin         | latent iron deficiency: <76, normal iron: 76-400, iron | 76, 400            |                     |                  |                 | 76-400       | 26/140 (18.6)  | 75/140 (53.6) | 30/140 (21.4) | frequency                  | baseline           |                                                 |                              |                                    | very preterm infants           |                                                                                                                                                                |                                                |                                                           |                                           |
| 102                                                                                                                                                                                                                                                                                                                                                                                                                                                                                                                                                                                                                                                                                                                                                                                                                                                                                                                                                                               | 2021 | Cattalini    |                                                        |                    | 200                 |                  |                 |              |                |               |               | median (IQR)               | baseline           | 563.8 (250-1068)                                | 227 (147-449)                | KD                                 | KawaCOVID                      | KawaCOVID vs KD                                                                                                                                                | yes                                            | Mann-Whitney test                                         |                                           |
| 103                                                                                                                                                                                                                                                                                                                                                                                                                                                                                                                                                                                                                                                                                                                                                                                                                                                                                                                                                                               | 2018 | Ghosh        |                                                        |                    |                     |                  |                 | 50-300       | 23/36          |               | 13/36         | median (IQR)               | baseline           | 763 (480-1820)                                  | 415 (262-852)                | septic shock                       | mortality                      |                                                                                                                                                                | no                                             | multivariate analysis                                     |                                           |
| 104                                                                                                                                                                                                                                                                                                                                                                                                                                                                                                                                                                                                                                                                                                                                                                                                                                                                                                                                                                               | 2016 | Cui          |                                                        |                    |                     |                  |                 |              |                |               |               | mean ± SD                  | baseline           | 35803 ± 5826                                    | 36290 ± 6205                 | secondary HLH                      |                                |                                                                                                                                                                |                                                |                                                           |                                           |
| 106                                                                                                                                                                                                                                                                                                                                                                                                                                                                                                                                                                                                                                                                                                                                                                                                                                                                                                                                                                               | 2020 | Deep         |                                                        |                    |                     |                  |                 |              |                |               |               | median (IQR)               | baseline           | 1107 (393-2668)                                 | 426 (209-958)                | MISC                               | severe AKI                     | severe AKI vs                                                                                                                                                  | yes                                            | multivariable logistic regression                         |                                           |
| 107                                                                                                                                                                                                                                                                                                                                                                                                                                                                                                                                                                                                                                                                                                                                                                                                                                                                                                                                                                               | 2008 | Mäkelä       |                                                        |                    |                     |                  |                 |              |                |               |               | mean (95%CI)               | baseline           | 148.2 (100.7-218.2)                             | 239.5 (135.2-                | very preterm                       | need for RBC                   | hematocrit <0.3 vs                                                                                                                                             | no                                             | mixed model analysis of variance                          |                                           |
| 108                                                                                                                                                                                                                                                                                                                                                                                                                                                                                                                                                                                                                                                                                                                                                                                                                                                                                                                                                                               | 2008 | Allen        | hyperferritinemia: ≥500                                |                    | 10000               | 0.92 (0.88-0.95) | 90              | 96           |                |               |               | median (range)             | peak               | 15830 (994-189721)                              |                              | HLH                                | HLH                            |                                                                                                                                                                | yes                                            | ROC curve                                                 |                                           |
| 109                                                                                                                                                                                                                                                                                                                                                                                                                                                                                                                                                                                                                                                                                                                                                                                                                                                                                                                                                                               | 2021 | Jat          | increased: >60 (until 9 years), >300 (10-12 years)     | 60, 300            |                     |                  |                 |              | 56/95 (58.9)   |               |               | median (IQR)               | not given          | 144 (80.1-290)                                  | 397.9 (148-879.2)            | 132 (80.1-196)                     | COVID-19                       | moderate-severe disease                                                                                                                                        | moderate-severe vs asymptomatic-mild           | no                                                        | Mann-Whitney test                         |
| 110                                                                                                                                                                                                                                                                                                                                                                                                                                                                                                                                                                                                                                                                                                                                                                                                                                                                                                                                                                               | 2017 | Ochiai       | hyperferritinemia: ≥500                                | 500                |                     |                  |                 |              | 24/176 (13.6)  |               |               | frequency                  | peak               |                                                 |                              |                                    | very low birth weight infants  | surgical ligation for patent ductus arteriosus, sepsis and moderate or severe states of bronchopulmonary dysplasia                                             |                                                | yes                                                       | multiple and logistic regression analysis |
| 113                                                                                                                                                                                                                                                                                                                                                                                                                                                                                                                                                                                                                                                                                                                                                                                                                                                                                                                                                                               | 2007 | Garcia       |                                                        |                    | 500                 |                  | 64              | 80           | 200-500        | 12/36 (33.3)  | 11/36 (30.6)  | 13/36 (36.1)               | median (IQR)       | baseline                                        | 303 (21-2210)                |                                    | severe sepsis, septic shock    | mortality                                                                                                                                                      | log                                            | yes                                                       | regression analysis                       |
| 114                                                                                                                                                                                                                                                                                                                                                                                                                                                                                                                                                                                                                                                                                                                                                                                                                                                                                                                                                                               | 2021 | Sa           |                                                        |                    |                     |                  |                 |              |                |               |               | median (IQR)               | peak               | 640 (1400)                                      | 549 (871)                    | MISC                               | neurology symptom              |                                                                                                                                                                | no                                             | not stated                                                |                                           |
| 115                                                                                                                                                                                                                                                                                                                                                                                                                                                                                                                                                                                                                                                                                                                                                                                                                                                                                                                                                                               | 2014 | Minoia       |                                                        |                    |                     |                  |                 | 18-300       |                |               |               | median (IQR)               | baseline           | 8235 (2048-22977)                               | 900 (171-2968)               | sJIA                               | MAS                            | before vs onset of MAS                                                                                                                                         | yes                                            | Mann-Whitney U test                                       |                                           |
| 124                                                                                                                                                                                                                                                                                                                                                                                                                                                                                                                                                                                                                                                                                                                                                                                                                                                                                                                                                                               | 2004 | Haiden       |                                                        |                    |                     |                  |                 |              |                |               |               | median (IQR)               | baseline           | 73.6 (34.3-99.9)                                | 97.5 (60.8-126.0)            | extremely low birth weight infants |                                |                                                                                                                                                                |                                                |                                                           |                                           |
| 127                                                                                                                                                                                                                                                                                                                                                                                                                                                                                                                                                                                                                                                                                                                                                                                                                                                                                                                                                                               | 2003 | Jacobs       |                                                        |                    |                     |                  |                 |              |                |               |               | mean ± SD                  | baseline           | 117.6 ± 16.2                                    | 134.4 ± 27.6                 | bronchiolitis, anemia              |                                |                                                                                                                                                                |                                                |                                                           |                                           |
| all ferritin values expressed in ng/mL unit                                                                                                                                                                                                                                                                                                                                                                                                                                                                                                                                                                                                                                                                                                                                                                                                                                                                                                                                       |      |              |                                                        |                    |                     |                  |                 |              |                |               |               |                            |                    |                                                 |                              |                                    |                                |                                                                                                                                                                |                                                |                                                           |                                           |
| AKI: acute kidney injury, AUC: area under the curve, COVID-19: coronavirus disease 2019, DIC: disseminated intravascular coagulation, ELISA: enzyme-linked immunosorbent assay, FS: febrile seizure, HBD: hepatobiliary dysfunction, HCT: hematopoietic cell transplantation, HF: heart failure, ICU: intensive care unit, IIE: inborn errors of immunity, IPH: idiopathic pulmonary hemosiderosis, HLH: hemophagocytic lymphohistiocytosis, KD: Kawasaki disease, MAS: macrophage activation syndrome, MISC: multisystem inflammatory syndrome in children, MODS: multiple organ dysfunction syndrome, MOF: multiple organ failure, PIMS-TS: paediatric inflammatory multisystem syndrome temporally associated with SARS-CoV-2, PCR: polymerase chain reaction, ROC: receiver operating characteristic, SARS-CoV 2: severe acute respiratory syndrome coronavirus 2, sJIA: systemic juvenile idiopathic arthritis, TPE: therapeutic plasma exchange, VL: visceral leishmaniasis |      |              |                                                        |                    |                     |                  |                 |              |                |               |               |                            |                    |                                                 |                              |                                    |                                |                                                                                                                                                                |                                                |                                                           |                                           |
