# Supplementary material for: Ferritin in pediatric critical illness: a scoping review
Source: PubMed Central journal article supplement — Clin Exp Pediatr. 2022 Sep 16;66(3):98–109. doi: 10.3345/cep.2022.00654 (PMC9989723; doi:10.3345/cep.2022.00654), 2022-09-16

**Supplementary Material 3. Symbol map showing country of origin, number of studies (color scale), and number of study subjects (circular area and label).**

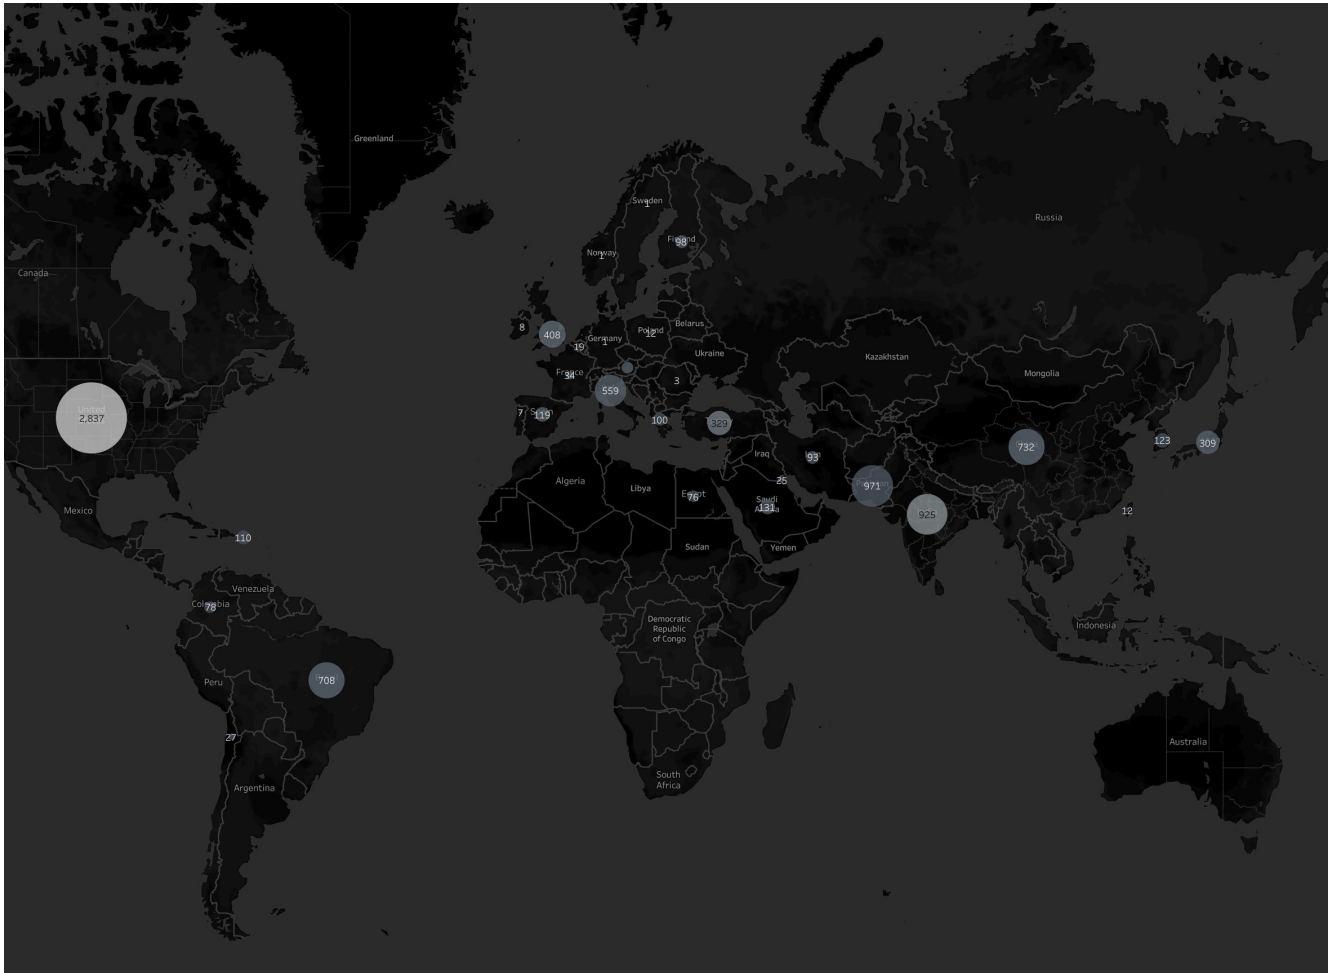

Supplement: cep-2022-00654-Supplementary-Material-3.pdf [file cep-2022-00654-Supplementary-Material-3.pdf]
